# Supplementary material
Source: PubMed Central journal article supplement (PMC4201956)
Supplement: NIHMS600548-supplement-Figures_1_-_3_Tables_1_-_3.pdf [file NIHMS600548-supplement-Figures_1_-_3_Tables_1_-_3.pdf]

## **Supplementary Data**

### **Involvement of extracellular vesicle long non-coding RNA (linc-VLDLR) in tumor cell responses to chemotherapy**

Kenji Takahashi, Irene K. Yan, Hiroaki Haga, Tushar Patel

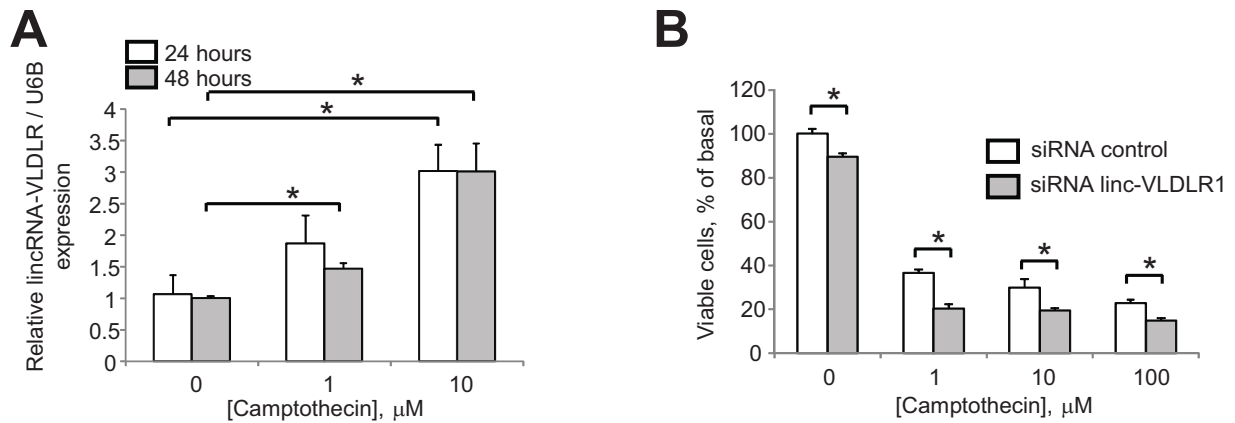

**Figure 1. Linc-VLDLR expression and response to camptothecin in HepG2 cells.** A, Cells were incubated with varying concentrations of camptothecin for 24 or 48 hours. Linc-VLDLR expression was determined by qRT-PCR, and normalized to that of RNU6B. Linc-VLDLR expression is represented relative to normalized expression in controls at each time point. B, Cells were transfected with siRNA to linc-VLDLR (siRNA VLDLR-1) or non-targeting siRNA controls. Transfected cells were then incubated with varying concentrations of camptothecin and cell viability was assessed after 48 hours.

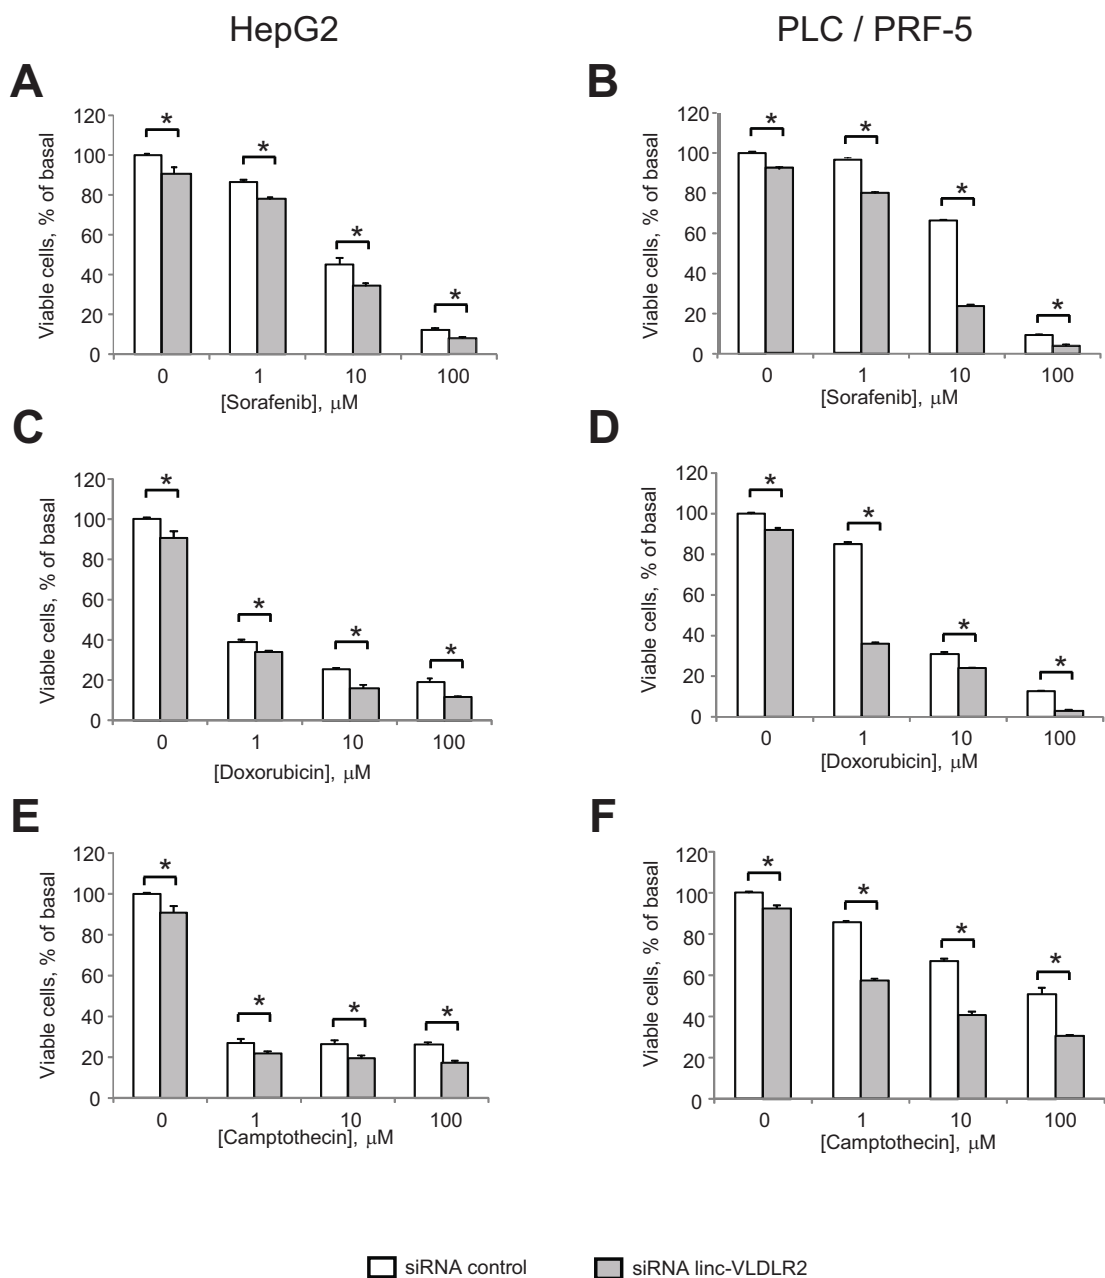

**Figure 2. Linc-VLDLR modulates response to chemotherapy.** HepG2 cells (A, C and E) or PLC/PRF-5 cells (B, D and F) were transfected with siRNA to linc-VLDLR (siRNA VLDLR-2) or non-targeting siRNA controls. Transfected cells were then incubated with varying concentrations of sorafenib (A, B), doxorubicin (C, D) or camptothecin (E, F) and cell viability was assessed after 48 hours. Bars represent the mean  $\pm$  SEM of 3 separate studies. \*,  $p < 0.05$ .

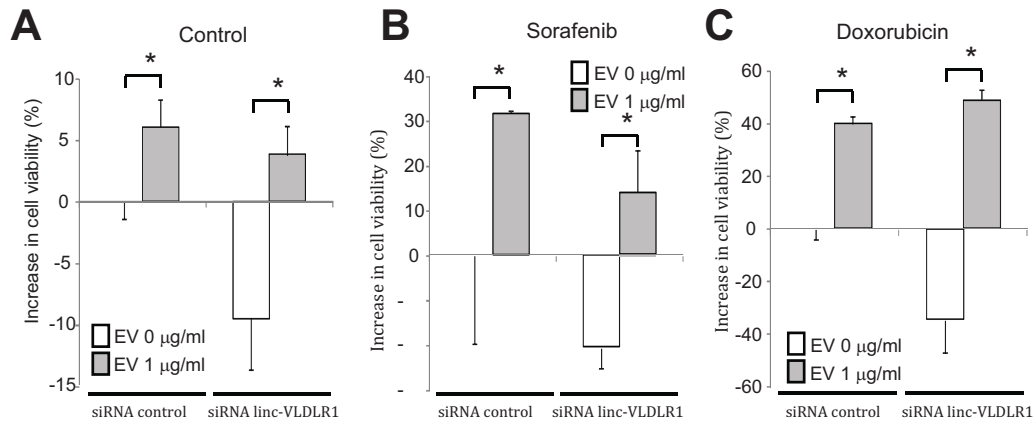

**Figure 3. Involvement of extracellular vesicle linc-VLDLR in tumor cell responses to chemotherapy.** A - C, HepG2 cells were transfected with siRNA to linc-VLDLR (siRNA VLDLR-1) or non-targeting controls. After 48 hours, cells were collected and plated ( $1 \times 10^4$ /well) on 96 well-plates in vesicle-depleted medium and incubated with 0 or 1  $\mu\text{g/ml}$  of HepG2 cell derived EVs. After 24 hours, cells were incubated with (A) diluent (DMSO) control, (B) 10  $\mu\text{M}$  sorafenib, or (C) 10  $\mu\text{M}$  doxorubicin. Cell viability was assessed after 72 hours using MTS assay. The bars represent the mean  $\pm$  SEM of the increase in cell viability from 3 independent studies. \*,  $p < 0.05$ .

## Supplementary Table 1

LncRNA expression was examined in HepG2 HCC cells and non-malignant human hepatocytes (HH). Data represents Ct values and SE values from three independent replicates.

| Gene name                             | HepG2 cells<br>Average of<br>Ct value | SE   | HH cells<br>Average of<br>Ct value | SE   |
|---------------------------------------|---------------------------------------|------|------------------------------------|------|
| 21A                                   | 23.32                                 | 1.12 | 21.57                              | 0.43 |
| 7SK                                   | 22.83                                 | 1.26 | 21.54                              | 0.75 |
| 7SL                                   | 21.94                                 | 1.11 | 20.25                              | 0.47 |
| Air                                   | 39.30                                 | 1.29 | 39.06                              | 0.49 |
| AK023948                              | 32.71                                 | 1.50 | 31.78                              | 0.62 |
| Alpha 280                             | 31.68                                 | 2.20 | 34.42                              | 0.87 |
| ANRIL                                 | 44.41                                 | 2.96 | 43.60                              | 0.83 |
| anti-NOS2A                            | 35.31                                 | 4.32 | 44.20                              | 3.19 |
| BACE1AS (family)                      | 33.54                                 | 1.67 | 31.48                              | 0.20 |
| CAR Intergenic 10                     | 37.13                                 | 2.29 | 34.23                              | 0.62 |
| DHFR upstream<br>transcripts (family) | 44.48                                 | 0.71 | 40.72                              | 0.40 |
| DISC2 (family)                        | 43.81                                 | 1.86 | 38.95                              | 0.41 |
| E2F4 antisense                        | 28.15                                 | 1.54 | 30.72                              | 0.67 |
| EgoA                                  | 35.11                                 | 1.93 | 33.73                              | 0.87 |
| EGO B                                 | 33.55                                 | 2.17 | 30.56                              | 0.57 |
| Emx2os                                | 39.59                                 | 1.76 | 37.31                              | 0.55 |
| GAS5-family                           | 26.91                                 | 1.94 | 24.33                              | 0.28 |
| Gomafu                                | 36.91                                 | 1.66 | 37.09                              | 2.80 |
| H19 antisense                         | 26.36                                 | 1.26 | 25.91                              | 0.41 |
| H19 upstream<br>conserved 1 & 2       | 26.31                                 | 1.28 | 24.85                              | 0.62 |
| HAR1A                                 | 32.78                                 | 1.10 | 31.23                              | 0.70 |
| HAR1B                                 | 38.06                                 | 2.16 | 37.54                              | 1.47 |
| HOTAIR                                | 44.77                                 | 1.83 | 43.54                              | 0.93 |
| HOTAIRM1                              | 31.88                                 | 1.45 | 29.23                              | 0.66 |
| HOTTIP                                | 37.72                                 | 1.56 | 36.31                              | 0.75 |
| Hoxa11as                              | 27.04                                 | 1.17 | 26.54                              | 0.12 |
| HOXA3as                               | 33.39                                 | 1.57 | 34.92                              | 0.34 |
| HOXA6as                               | 29.54                                 | 1.75 | 28.23                              | 0.41 |
| IGF2AS (family)                       | 36.32                                 | 2.56 | 33.58                              | 0.68 |
| IPW                                   | 45.41                                 | 1.93 | 43.82                              | 0.96 |
| Jpx                                   | 36.15                                 | 1.40 | 34.05                              | 0.72 |
| Kcnq1ot1                              | 35.46                                 | 1.49 | 34.20                              | 0.39 |
| KRAS P1                               | 42.67                                 | 1.62 | 41.19                              | 0.30 |
| lincRNA-p21                           | 34.35                                 | 1.40 | 31.19                              | 0.16 |
| lincRNA-RoR                           | 29.73                                 | 2.74 | 33.61                              | 0.92 |
| lincRNA-SFMBT2                        | 29.91                                 | 2.44 | 37.95                              | 3.04 |
| lincRNA-VLDLR                         | 29.07                                 | 2.09 | 31.66                              | 0.68 |
| LOC285194                             | 38.59                                 | 2.37 | 38.08                              | 0.58 |

|                          |       |      |       |      |
|--------------------------|-------|------|-------|------|
| LUST                     | 24.43 | 1.41 | 25.27 | 2.13 |
| Malat1                   | 28.86 | 1.76 | 25.82 | 0.49 |
| mascRNA                  | 39.26 | 5.64 | 31.31 | 0.33 |
| MEG3 (family)            | 37.15 | 1.89 | 33.19 | 0.34 |
| MEG9                     | 45.10 | 1.96 | 42.90 | 1.42 |
| MER11C                   | 33.33 | 1.20 | 32.57 | 0.38 |
| ncR-uPAR                 | 25.88 | 1.56 | 24.62 | 0.45 |
| NDM29                    | 24.88 | 1.37 | 23.45 | 0.84 |
| NEAT1 (family)           | 30.01 | 1.33 | 29.20 | 0.45 |
| Nespas                   | 33.30 | 1.25 | 32.58 | 0.62 |
| NRON                     | 33.76 | 1.49 | 32.94 | 0.47 |
| NTT                      | 34.47 | 1.81 | 32.13 | 0.47 |
| p53 mRNA                 | 27.49 | 1.63 | 27.28 | 2.23 |
| PR antisense transcripts | 47.61 | 1.31 | 47.05 | 1.57 |
| PRINS                    | 33.96 | 1.47 | 30.58 | 0.43 |
| PSF inhibiting RNA       | 38.93 | 1.01 | 37.46 | 0.47 |
| RNCR3                    | 43.61 | 1.44 | 39.02 | 1.84 |
| SAF                      | 35.52 | 1.24 | 34.91 | 0.44 |
| SCA8                     | 36.78 | 2.35 | 34.92 | 0.27 |
| snaR                     | 23.98 | 1.30 | 25.16 | 0.63 |
| SNHG1                    | 32.48 | 1.40 | 31.36 | 0.33 |
| SNHG3                    | 38.26 | 2.01 | 35.87 | 0.81 |
| SNHG4                    | 25.99 | 1.28 | 26.47 | 2.35 |
| SNHG5                    | 25.99 | 1.38 | 25.55 | 0.24 |
| SNHG6                    | 29.54 | 1.31 | 28.27 | 0.54 |
| Sox2ot                   | 38.27 | 2.22 | 35.25 | 0.41 |
| SRA                      | 33.21 | 1.37 | 31.69 | 0.40 |
| ST7OT                    | 32.55 | 1.53 | 31.65 | 0.12 |
| TEA ncRNAs (family)      | 43.68 | 0.52 | 41.31 | 1.09 |
| Tmevpg1                  | 36.61 | 1.96 | 34.04 | 0.23 |
| TncRNA                   | 30.85 | 1.29 | 28.98 | 0.60 |
| Tsix                     | 27.06 | 0.68 | 23.79 | 0.35 |
| TUG1 (family)            | 33.35 | 1.53 | 32.75 | 0.31 |
| UCA1                     | 47.33 | 1.40 | 45.48 | 1.07 |
| UM9-5                    | 34.20 | 1.51 | 35.00 | 1.51 |
| WT1-AS                   | 35.77 | 1.48 | 31.69 | 0.14 |
| Xist                     | 34.87 | 1.74 | 28.82 | 0.31 |
| Y RNA-1                  | 22.83 | 1.20 | 21.07 | 0.60 |
| Zeb2NAT                  | 33.71 | 1.55 | 32.06 | 0.28 |
| Zfas1                    | 25.31 | 1.23 | 25.25 | 0.30 |
| Zfhx2as                  | 33.11 | 1.37 | 33.72 | 0.35 |
| 18S rRNA                 | 17.66 | 1.69 | 15.87 | 0.51 |
| RNU43 (snoRNA)           | 25.88 | 1.69 | 23.40 | 0.65 |
| GAPDH                    | 20.79 | 1.40 | 19.55 | 0.30 |
| LAMIN A/C                | 30.16 | 1.38 | 30.03 | 0.33 |
| U6 snRNA                 | 23.15 | 1.19 | 21.61 | 0.83 |

---

## Supplementary Table 2

LncRNA expression was examined in HepG2 cells and EV derived from these cells. Data represents Ct values and SE values from three independent replicates.

| Gene name                             | HepG2 derived EV<br>Average of<br>Ct value | SE   | HepG2 cells<br>Average of<br>Ct value | SE   |
|---------------------------------------|--------------------------------------------|------|---------------------------------------|------|
| 21A                                   | 38.31                                      | 5.99 | 23.32                                 | 1.12 |
| 7SK                                   | 36.46                                      | 1.33 | 22.83                                 | 1.26 |
| 7SL                                   | 31.84                                      | 1.32 | 21.94                                 | 1.11 |
| Air                                   | 46.31                                      | 2.75 | 39.30                                 | 1.29 |
| AK023948                              | 38.34                                      | 1.33 | 32.71                                 | 1.50 |
| Alpha 280                             | 41.04                                      | 4.62 | 31.68                                 | 2.20 |
| anti-NOS2A                            | 42.89                                      | 1.75 | 35.31                                 | 4.32 |
| BACE1AS (family)                      | 43.45                                      | 3.29 | 33.54                                 | 1.67 |
| CAR Intergenic 10                     | 39.00                                      | 1.57 | 37.13                                 | 2.29 |
| DHFR upstream<br>transcripts (family) | 46.94                                      | 1.70 | 44.48                                 | 0.71 |
| DISC2 (family)                        | 46.08                                      | 1.98 | 43.81                                 | 1.86 |
| E2F4 antisense                        | 38.61                                      | 5.69 | 28.15                                 | 1.54 |
| EgoA                                  | 45.44                                      | 2.60 | 35.11                                 | 1.93 |
| EGO B                                 | 44.09                                      | 2.04 | 33.55                                 | 2.17 |
| GAS5-family                           | 36.19                                      | 0.93 | 26.91                                 | 1.94 |
| H19 antisense                         | 38.13                                      | 1.52 | 26.36                                 | 1.26 |
| H19 upstream<br>conserved 1 & 2       | 33.10                                      | 0.97 | 26.31                                 | 1.28 |
| HAR1A                                 | 46.49                                      | 1.85 | 32.78                                 | 1.10 |
| HAR1B                                 | 40.81                                      | 3.35 | 38.06                                 | 2.16 |
| HOTAIRM1                              | 41.51                                      | 2.05 | 31.88                                 | 1.45 |
| Hoxa11as                              | 35.79                                      | 0.42 | 27.04                                 | 1.17 |
| HOXA6as                               | 40.54                                      | 1.66 | 29.54                                 | 1.75 |
| Kcnq1ot1                              | 42.88                                      | 3.65 | 35.46                                 | 1.49 |
| L1PA16                                | 44.79                                      | 2.64 | 35.78                                 | 1.92 |
| lincRNA-p21                           | 39.17                                      | 0.59 | 34.35                                 | 1.40 |
| lincRNA-RoR                           | 34.00                                      | 0.71 | 29.73                                 | 2.74 |
| lincRNA-SFMBT2                        | 39.16                                      | 5.43 | 29.91                                 | 2.44 |
| lincRNA-VLDLR                         | 31.98                                      | 0.44 | 29.07                                 | 2.09 |
| LUST                                  | 34.68                                      | 1.82 | 24.43                                 | 1.41 |
| Malat1                                | 40.95                                      | 1.91 | 28.86                                 | 1.76 |
| mascRNA                               | 45.24                                      | 2.41 | 39.26                                 | 5.64 |
| MEG3 (family)                         | 47.55                                      | 1.23 | 37.15                                 | 1.89 |
| MER11C                                | 41.22                                      | 1.34 | 33.33                                 | 1.20 |
| ncR-uPAR                              | 39.27                                      | 1.72 | 25.88                                 | 1.56 |
| NDM29                                 | 33.18                                      | 1.13 | 24.88                                 | 1.37 |
| NEAT1 (family)                        | 35.11                                      | 1.11 | 30.01                                 | 1.33 |
| Nespas                                | 38.60                                      | 0.58 | 33.30                                 | 1.25 |

|                |       |      |       |      |
|----------------|-------|------|-------|------|
| NRON           | 42.52 | 1.65 | 33.76 | 1.49 |
| NTT            | 43.91 | 2.62 | 34.47 | 1.81 |
| SAF            | 42.37 | 2.41 | 35.52 | 1.24 |
| SCA8           | 43.61 | 1.32 | 36.78 | 2.35 |
| snaR           | 34.08 | 0.62 | 23.98 | 1.30 |
| SNHG1          | 41.66 | 2.07 | 32.48 | 1.40 |
| SNHG4          | 33.72 | 1.28 | 25.99 | 1.28 |
| SNHG5          | 37.72 | 2.08 | 25.99 | 1.38 |
| SNHG6          | 35.41 | 0.72 | 29.54 | 1.31 |
| Sox2ot         | 45.16 | 3.04 | 38.27 | 2.22 |
| SRA            | 44.95 | 2.60 | 33.21 | 1.37 |
| ST7OT          | 40.55 | 1.68 | 32.55 | 1.53 |
| TncRNA         | 43.40 | 3.30 | 30.85 | 1.29 |
| Tsix           | 30.90 | 2.56 | 27.06 | 0.68 |
| TUG1 (family)  | 39.34 | 3.49 | 33.35 | 1.53 |
| UM9-5          | 48.33 | 0.84 | 34.20 | 1.51 |
| Y RNA-1        | 29.48 | 1.17 | 22.83 | 1.20 |
| Zeb2NAT        | 42.49 | 1.23 | 33.71 | 1.55 |
| Zfas1          | 40.72 | 2.10 | 25.31 | 1.23 |
| Zfhx2as        | 39.66 | 2.44 | 33.11 | 1.37 |
| 18S rRNA       | 27.33 | 0.96 | 14.98 | 1.69 |
| RNU43 (snoRNA) | 34.62 | 4.08 | 22.96 | 1.69 |
| GAPDH          | 36.88 | 4.32 | 19.64 | 1.40 |
| U6 snRNA       | 33.37 | 0.69 | 20.72 | 1.19 |

---



### Supplementary Table 3

LncRNA expression was examined in MzChA1 cells and EV derived from these cells. Data represents Ct values and SE values from three independent replicates.

| Gene name                          | Mz-ChA-1 derived EV |      | Mz-ChA-1 cells      |      |
|------------------------------------|---------------------|------|---------------------|------|
|                                    | Average of Ct value | SE   | Average of Ct value | SE   |
| 7SK                                | 32.28               | 1.02 | 20.86               | 0.96 |
| 7SL                                | 27.20               | 1.42 | 20.75               | 1.12 |
| AK023948                           | 38.17               | 2.34 | 33.51               | 0.23 |
| Alpha 280                          | 34.55               | 0.71 | 34.70               | 0.70 |
| anti-NOS2A                         | 44.08               | 3.19 | 38.52               | 1.66 |
| BACE1AS (family)                   | 38.62               | 2.45 | 32.86               | 0.93 |
| CAR Intergenic 10                  | 37.64               | 1.84 | 38.03               | 1.27 |
| DHFR upstream transcripts (family) | 44.75               | 2.71 | 43.77               | 0.33 |
| DISC2 (family)                     | 42.20               | 1.98 | 44.48               | 0.52 |
| DLG2AS (family)                    | 44.90               | 2.65 | 34.51               | 1.26 |
| E2F4 antisense                     | 38.16               | 5.94 | 30.16               | 0.43 |
| EgoA                               | 36.50               | 1.37 | 35.95               | 0.85 |
| EGO B                              | 35.83               | 0.87 | 33.16               | 1.18 |
| Emx2os                             | 43.56               | 2.09 | 39.28               | 1.05 |
| GAS5-family                        | 29.87               | 1.69 | 25.25               | 0.52 |
| Gomafu                             | 45.37               | 2.00 | 36.52               | 1.37 |
| H19 antisense                      | 35.45               | 1.27 | 27.30               | 0.69 |
| H19 upstream conserved 1 & 2       | 38.74               | 5.75 | 25.86               | 0.89 |
| HAR1A                              | 43.41               | 1.87 | 33.12               | 0.31 |
| HAR1B                              | 35.72               | 1.90 | 39.82               | 1.38 |
| HOTAIR                             | 41.74               | 4.21 | 44.59               | 0.99 |
| HOTAIRM1                           | 39.84               | 0.38 | 32.51               | 0.75 |
| HOTTIP                             | 49.12               | 0.46 | 38.53               | 0.96 |
| Hoxa11as                           | 35.03               | 2.19 | 27.53               | 0.64 |
| HOXA6as                            | 35.64               | 0.20 | 29.43               | 1.08 |
| IPW                                | 44.93               | 3.23 | 47.69               | 0.72 |
| Jpx                                | 44.37               | 3.39 | 35.65               | 0.47 |
| Kcnq1ot1                           | 43.46               | 3.37 | 38.17               | 1.10 |
| L1PA16                             | 44.69               | 2.77 | 41.60               | 1.61 |
| lincRNA-p21                        | 37.75               | 0.93 | 33.18               | 0.85 |
| lincRNA-RoR                        | 32.48               | 0.99 | 34.74               | 0.68 |
| lincRNA-SFMBT2                     | 31.45               | 0.99 | 34.44               | 0.67 |
| lincRNA-VLDLR                      | 29.90               | 0.89 | 33.51               | 0.50 |
| LUST                               | 30.00               | 2.86 | 23.82               | 0.98 |
| mascRNA                            | 38.07               | 2.48 | 34.05               | 0.80 |

|                |       |      |       |      |
|----------------|-------|------|-------|------|
| MEG9           | 45.59 | 2.78 | 45.28 | 1.91 |
| MER11C         | 38.73 | 0.35 | 33.48 | 0.44 |
| ncR-uPAR       | 33.77 | 2.72 | 25.57 | 0.60 |
| NDM29          | 30.87 | 0.97 | 25.09 | 0.54 |
| NEAT1 (family) | 32.15 | 0.86 | 31.09 | 0.67 |
| Nespas         | 36.68 | 1.79 | 34.07 | 0.86 |
| NRON           | 41.66 | 4.18 | 34.27 | 0.66 |
| NTT            | 42.47 | 4.14 | 34.18 | 0.54 |
| p53 mRNA       | 47.68 | 2.07 | 26.59 | 0.29 |
| RNCR3          | 44.10 | 3.34 | 42.15 | 0.64 |
| SAF            | 43.28 | 2.72 | 36.00 | 0.60 |
| SCA8           | 40.66 | 4.76 | 36.58 | 1.83 |
| snaR           | 31.66 | 1.51 | 27.44 | 0.80 |
| SNHG3          | 46.30 | 1.28 | 38.23 | 1.19 |
| SNHG4          | 31.23 | 2.07 | 25.36 | 1.06 |
| SNHG5          | 40.99 | 4.27 | 26.56 | 0.47 |
| SNHG6          | 40.60 | 4.71 | 27.90 | 0.41 |
| Sox2ot         | 43.72 | 3.20 | 38.28 | 1.10 |
| SRA            | 42.31 | 4.50 | 33.57 | 0.53 |
| ST7OT          | 39.28 | 3.32 | 32.89 | 0.49 |
| TncRNA         | 41.01 | 4.51 | 29.95 | 0.58 |
| Tsix           | 27.69 | 1.04 | 25.71 | 0.78 |
| TUG1 (family)  | 37.21 | 5.90 | 36.24 | 0.36 |
| UM9-5          | 41.01 | 3.71 | 35.14 | 0.88 |
| Y RNA-1        | 26.80 | 0.98 | 21.82 | 0.44 |
| Zeb2NAT        | 43.91 | 3.13 | 33.20 | 1.07 |
| Zfas1          | 35.00 | 1.07 | 25.24 | 0.39 |
| Zfhx2as        | 39.17 | 1.27 | 33.18 | 0.53 |
| 18S rRNA       | 22.76 | 1.01 | 17.43 | 1.22 |
| GAPDH          | 38.75 | 3.77 | 20.67 | 0.22 |
| LAMIN A/C      | 43.16 | 2.96 | 31.43 | 0.66 |
| U6 snRNA       | 28.80 | 1.33 | 21.82 | 0.85 |

---
